# Supplementary material
Source: Springer Nature journal article supplement (https://www.springermedizin.de/resource/supplementary/13048_2008_6_MOESM5_ESM.pdf/9664704)

N T

1

2

3

4

5

6

7

8

9

10

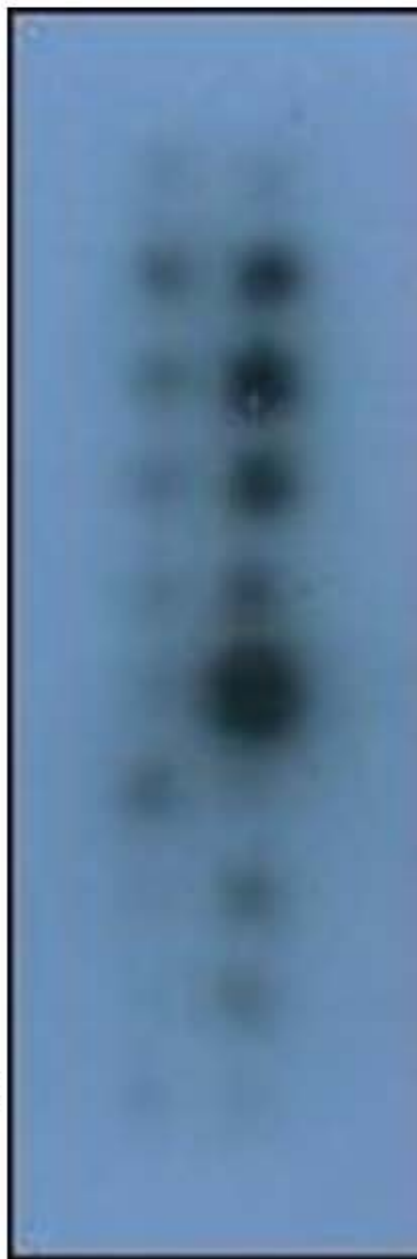

Supplement: MOESM5 [file 9664704]
